# Supplementary material for: RAPP-containing arrest peptides induce translational stalling by short circuiting the ribosomal peptidyltransferase activity
Source: PubMed Central journal article supplement (PMC10951233; doi:10.1038/s41467-024-46761-3), 2024-03-19
Supplement: 41467_2024_46761_MOESM3_ESM.pdf [file 41467_2024_46761_MOESM3_ESM.pdf]

## **Description of Additional Supplementary Files**

### **File name: Supplementary Movie 1**

**Description: Cryo-EM map density and model for the ApdA nascent chain.** P-site tRNA (blue) with ApdA nascent chain (orange) and A-site tRNA (green) with Pro moiety (purple). Residues of RAPP motif indicated at end of rotation.

### **File name: Supplementary Movie 2**

**Description: Cryo-EM map density and model for the ApdP nascent chain.** P-site tRNA (blue) with ApdP nascent chain (red) and A-site tRNA (green) with Pro moiety (cyan). Residues of RAPP motif indicated at end of rotation.
