# Supplementary material for: RAPP-containing arrest peptides induce translational stalling by short circuiting the ribosomal peptidyltransferase activity
Source: PubMed Central journal article supplement (PMC10951233; doi:10.1038/s41467-024-46761-3), 2024-03-19
Supplement: 41467_2024_46761_MOESM6_ESM.pdf [file 41467_2024_46761_MOESM6_ESM.pdf]

## Reporting Summary

Nature Portfolio wishes to improve the reproducibility of the work that we publish. This form provides structure for consistency and transparency in reporting. For further information on Nature Portfolio policies, see our [Editorial Policies](#) and the [Editorial Policy Checklist](#).

### Statistics

For all statistical analyses, confirm that the following items are present in the figure legend, table legend, main text, or Methods section.

n/a | Confirmed

- The exact sample size ( $n$ ) for each experimental group/condition, given as a discrete number and unit of measurement
- A statement on whether measurements were taken from distinct samples or whether the same sample was measured repeatedly
- The statistical test(s) used AND whether they are one- or two-sided  
*Only common tests should be described solely by name; describe more complex techniques in the Methods section.*
- A description of all covariates tested
- A description of any assumptions or corrections, such as tests of normality and adjustment for multiple comparisons
- A full description of the statistical parameters including central tendency (e.g. means) or other basic estimates (e.g. regression coefficient) AND variation (e.g. standard deviation) or associated estimates of uncertainty (e.g. confidence intervals)
- For null hypothesis testing, the test statistic (e.g.  $F$ ,  $t$ ,  $r$ ) with confidence intervals, effect sizes, degrees of freedom and  $P$  value noted  
*Give  $P$  values as exact values whenever suitable.*
- For Bayesian analysis, information on the choice of priors and Markov chain Monte Carlo settings
- For hierarchical and complex designs, identification of the appropriate level for tests and full reporting of outcomes
- Estimates of effect sizes (e.g. Cohen's  $d$ , Pearson's  $r$ ), indicating how they were calculated

*Our web collection on [statistics for biologists](#) contains articles on many of the points above.*

### Software and code

Policy information about [availability of computer code](#)

Data collection

Data analysis

For manuscripts utilizing custom algorithms or software that are central to the research but not yet described in published literature, software must be made available to editors and reviewers. We strongly encourage code deposition in a community repository (e.g. GitHub). See the Nature Portfolio [guidelines for submitting code & software](#) for further information.

## Data

Policy information about [availability of data](#)

All manuscripts must include a [data availability statement](#). This statement should provide the following information, where applicable:

- Accession codes, unique identifiers, or web links for publicly available datasets
- A description of any restrictions on data availability
- For clinical datasets or third party data, please ensure that the statement adheres to our [policy](#)

Micrographs have been deposited as uncorrected frames in the Electron Microscopy Public Image Archive (EMPIAR) with the accession codes EMPIAR-11698 [<https://www.ebi.ac.uk/pdbe/emdb/empiar/entry/11698/>] (ApdP-SRC) and EMPIAR-11702 [<https://www.ebi.ac.uk/pdbe/emdb/empiar/entry/11702/>] (ApdA-SRC). Cryo-EM maps have been deposited in the Electron Microscopy Data Bank (EMDB) with accession codes EMD-18332 [<https://www.ebi.ac.uk/pdbe/entry/emdb/EMD-18332/>] (ApdA-SRC with A- and P-site tRNA), EMD-18341 [<https://www.ebi.ac.uk/pdbe/entry/emdb/EMD-18341/>] (ApdA-SRC with P-site tRNA only), EMD-18320 [<https://www.ebi.ac.uk/pdbe/entry/emdb/EMD-18320/>] (ApdP-SRC with A- and P-site tRNA), EMD-18340 [<https://www.ebi.ac.uk/pdbe/entry/emdb/EMD-18340/>] (ApdP-SRC with P-site tRNA only). Molecular models have been deposited in the Protein Data Bank with accession codes 8QCQ [<https://doi.org/10.2210/pdb8QCQ/pdb>] (ApdA-SRC with A- and P-site tRNA) and 8QBT [<https://doi.org/10.2210/pdb8QBT/pdb>] (ApdP-SRC with A- and P-site tRNA). Publicly available data used included PDB ID 1VY4, 8CVK, 6OLG, 3JBU, 5NWX and 5JTE. Source data are provided with this paper.

## Research involving human participants, their data, or biological material

Policy information about studies with [human participants or human data](#). See also policy information about [sex, gender \(identity/presentation\), and sexual orientation](#) and [race, ethnicity and racism](#).

|                                                                    |     |
|--------------------------------------------------------------------|-----|
| Reporting on sex and gender                                        | N/A |
| Reporting on race, ethnicity, or other socially relevant groupings | N/A |
| Population characteristics                                         | N/A |
| Recruitment                                                        | N/A |
| Ethics oversight                                                   | N/A |

Note that full information on the approval of the study protocol must also be provided in the manuscript.

## Field-specific reporting

Please select the one below that is the best fit for your research. If you are not sure, read the appropriate sections before making your selection.

Life sciences  Behavioural & social sciences  Ecological, evolutionary & environmental sciences

For a reference copy of the document with all sections, see [nature.com/documents/nr-reporting-summary-flat.pdf](https://nature.com/documents/nr-reporting-summary-flat.pdf)

## Life sciences study design

All studies must disclose on these points even when the disclosure is negative.

|                 |                                                                                                                                                                                                                                                                                                                                                                                                                                                                                                                                                                                                                                                                                                                                                          |
|-----------------|----------------------------------------------------------------------------------------------------------------------------------------------------------------------------------------------------------------------------------------------------------------------------------------------------------------------------------------------------------------------------------------------------------------------------------------------------------------------------------------------------------------------------------------------------------------------------------------------------------------------------------------------------------------------------------------------------------------------------------------------------------|
| Sample size     | No sample size calculation was performed. The sample size was selected on the basis of a three-day data collection, which was chosen to obtain sufficient number of particles to bring the resolution of the resulting complexes towards 2A resolution.                                                                                                                                                                                                                                                                                                                                                                                                                                                                                                  |
| Data exclusions | Micrographs with low estimated resolution or poorly fitted CTFs were discarded, as were particles that clustered into poorly defined classes during 2D and 3D classification.                                                                                                                                                                                                                                                                                                                                                                                                                                                                                                                                                                            |
| Replication     | For beta-galactosidase assay, three biological replicates were averaged.<br>For in vitro translation arrest assay, two biological experiments were successfully replicated One is presented in the main Figure 4, the other is shown in the source data, or in Supplementary Figure 13 for the blots that were successfully replicated in Supplementary Figure 6.<br>Randomization was not performed for other biochemical experiments since more appropriate controls were performed using defined inactive variants of the wildtype sequence rather than random sequences.                                                                                                                                                                             |
| Randomization   | For 3D refinement in RELION, particles are randomly placed in one of two subsets. These subsets are maintained for CTF refinement.<br>Otherwise, no randomization was performed. For the molecular dynamics simulations, to obtain statistical uncertainties, 1000 subsets of conformations were randomly selected and the analysis was repeated on each subset. For each variant of ApdP, 20 independent simulations were performed; the sampled conformations in each trajectory comprising an experimental group. In each simulation the atoms had the same initial coordinates, apart from the mutated residues, but the initial velocities were randomly drawn from a Maxwell-distribution at 300K to generate independent stochastic trajectories. |

## Blinding

No blinding was performed as blinding is not possible or not applicable for the experiments because the identity of the analyzed sample was known.

## Reporting for specific materials, systems and methods

We require information from authors about some types of materials, experimental systems and methods used in many studies. Here, indicate whether each material, system or method listed is relevant to your study. If you are not sure if a list item applies to your research, read the appropriate section before selecting a response.

### Materials & experimental systems

| n/a                                 | Involvement in the study                               |
|-------------------------------------|--------------------------------------------------------|
| <input type="checkbox"/>            | <input checked="" type="checkbox"/> Antibodies         |
| <input checked="" type="checkbox"/> | <input type="checkbox"/> Eukaryotic cell lines         |
| <input checked="" type="checkbox"/> | <input type="checkbox"/> Palaeontology and archaeology |
| <input checked="" type="checkbox"/> | <input type="checkbox"/> Animals and other organisms   |
| <input checked="" type="checkbox"/> | <input type="checkbox"/> Clinical data                 |
| <input checked="" type="checkbox"/> | <input type="checkbox"/> Dual use research of concern  |
| <input checked="" type="checkbox"/> | <input type="checkbox"/> Plants                        |

### Methods

| n/a                                 | Involvement in the study                        |
|-------------------------------------|-------------------------------------------------|
| <input checked="" type="checkbox"/> | <input type="checkbox"/> ChIP-seq               |
| <input checked="" type="checkbox"/> | <input type="checkbox"/> Flow cytometry         |
| <input checked="" type="checkbox"/> | <input type="checkbox"/> MRI-based neuroimaging |

## Antibodies

Antibodies used

anti-GFP antibody (Wako, 012-22541, clone mFX75), anti-FLAG antibody (Sigma-Aldrich, F3165, clone M2)

Validation

The specificity of the anti-GFP and anti-FLAG antibodies were validated by Western blotting in this study, showing that the size of the proteins detected by the antibodies were equivalent to the size of target proteins synthesized in vitro using specific DNA templates encoding the target proteins.

## Plants

Seed stocks

N/A

Novel plant genotypes

N/A

Authentication

N/A
